# Supplementary material
Source: publisher figshare collection journal article supplement (https://sage.figshare.com/ndownloader/files/15473270)
Supplement: Supplementary file 1 [file 15473270]

## SUPPLEMENTARY FILE 2

### 1. COMPARISON OF DIFFERENT DOSAGE FORMS OF CLARITHROMYCIN

| <b>Generic: Clarithromycin</b> |                           |                                       |
|--------------------------------|---------------------------|---------------------------------------|
| <b>Strength</b>                | <b>Available quantity</b> | <b>National/multinational company</b> |
| <b>Suspensions</b>             |                           |                                       |
| 125mg/5ml                      | 60ml                      | National and multinational            |
| 125mg/5ml                      | 50ml                      | National and multinational            |
| 250mg/5ml                      | 70ml                      |                                       |
| 125mg/5ml                      |                           | National and multinational            |
| 125mg/5ml                      | 60ml                      | National                              |
| 250mg/5ml                      | 70ml                      |                                       |
| 125mg/5ml                      | 60ml                      | National and multinational            |
| 125mg/5ml                      | 30ml,60ml                 | National and multinational            |
| <b>Pediatric Drops</b>         |                           |                                       |
| 125mg/5ml                      | 25ml                      | National and multinational            |
| 125mg/5ml                      | 30ml                      | National and multinational            |
| <b>Injection</b>               |                           |                                       |
| 500mg/vial                     | --                        | National and multinational            |
| <b>Tablets /Capsules</b>       |                           |                                       |
| 250mg,500mg                    | 10 tabs                   | National and multinational            |

## 2. COMPARISON OF DIFFERENT DOSAGE FORMS OF CEFOTAXIME

| <b>Generic: Cefotaxime</b> |                           |                                       |
|----------------------------|---------------------------|---------------------------------------|
| <b>Strength</b>            | <b>Available quantity</b> | <b>National/multinational company</b> |
| <b>Injection</b>           |                           |                                       |
| 0.25g,0.5g,1g,2g           | Single vial packing       | <b>National and multinational</b>     |

### 3. COMPARISON OF DIFFERENT DOSAGE FORMS OF METRONIDAZOLE

| <b>Generic: Metronidazole</b> |                           |                                       |
|-------------------------------|---------------------------|---------------------------------------|
| <b>Strength</b>               | <b>Available quantity</b> | <b>National/multinational company</b> |
| <b>Suspensions</b>            |                           |                                       |
| 200mg/5ml                     | 60ml                      | National and multinational            |
| 200mg/5ml                     | 60ml,450ml                | National                              |
| <b>Infusion</b>               |                           |                                       |
| 500mg/100ml                   | 1 vial                    | National and multinational            |
| <b>Suppositories</b>          |                           |                                       |
| 500mg, 1g                     | 10 in 1 pack              | National and multinational            |
| <b>Tablets /Capsules</b>      |                           |                                       |
| 400mg                         | 10 tabs                   | National                              |
| 200mg,400mg                   | 10 tabs                   | National and multinational            |

#### 4. COMPARISON OF DIFFERENT OF DOSAGE FORMS OF AMOXICILLIN

| <b>Generic: Amoxicillin</b>         |                              |                                       |
|-------------------------------------|------------------------------|---------------------------------------|
| <b>Strength</b>                     | <b>Available quantity</b>    | <b>National/multinational company</b> |
| <b>Syrups</b>                       |                              |                                       |
| 125mg/5ml<br>250mg/5ml              | 60ml,90ml                    | National and multinational            |
| 125mg/5ml<br>250mg/5ml              | 90ml                         | National                              |
| <b>Pediatric Drops</b>              |                              |                                       |
| 125mg/1.25ml                        | 10ml,20ml                    | National and multinational            |
| 125mg/1.25ml                        | 20ml                         | National                              |
| <b>Injection</b>                    |                              |                                       |
| 250mg/vial<br>500mg/vial            | 10 vials<br>10 vials         | National                              |
| 250mg/vial<br>500mg/vial            | 1 vial<br>1 vial             | National                              |
| 250mg/vial<br>500mg/vial            | 10 vials<br>1 vial ,10 vials | National and multinational            |
| 250mg/vial<br>500mg/vial<br>1g/vial | 1 Vial                       | National                              |
| <b>Tablets /Capsules</b>            |                              |                                       |
| 250mg,500mg                         | 20 capsules                  | National and multinational            |

## 5. COMPARISON OF DIFFERENT DOSAGE FORMS OF GENTAMICIN

| <b>Generic: Gentamicin</b>                   |                                                 |                                       |
|----------------------------------------------|-------------------------------------------------|---------------------------------------|
| <b>Strength</b>                              | <b>Available quantity</b>                       | <b>National/multinational company</b> |
| <b>Injection</b>                             |                                                 |                                       |
| 20mg/2ml,<br>80mg/2ml,<br>160mg/2ml          | 5, 25 ampoules<br>10, 25 ampoules<br>1 ampoules | <b>National and multinational</b>     |
| 40mg/ml,<br>80mg/2ml                         | 3 ampoules<br>2ampoles                          | <b>National</b>                       |
| 80mg/2ml,<br>80mg/vial                       | 5, 25, 100ampoules<br>25 vials                  | <b>National</b>                       |
| 10mg/ml,<br>20mg/ml,<br>40mg/ml,<br>80mg/2ml | 5 ampoules                                      | <b>National and multinational</b>     |
| 80mg/ml                                      | 2 ampoules                                      | <b>National</b>                       |
